# Supplementary material for: Determination of Pb2+ and Cd2+ ions in raw milk, honey and groundnut shell using TSAB/MWCNT
Source: Royal Society of Chemistry journal article supplement (doi:10.1039/d3ma00062a), 2023-01-01
Supplement: d3ma00062a1.pdf [file d3ma00062a1.pdf]

Supplementary information

Fig. S1. FT-IR of the synthesized TSAB

Fig. S2.  $^1\text{H}$ -NMR of the synthesized TSAB

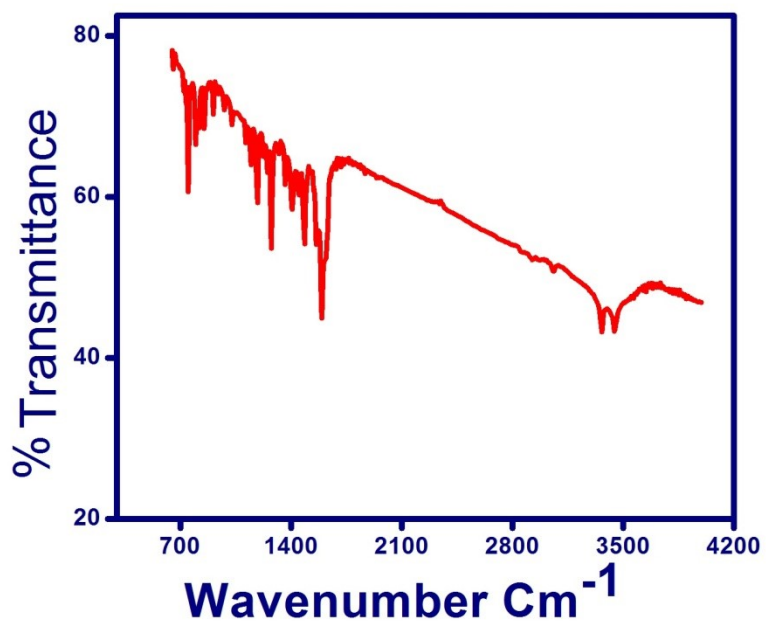

Fig. S1. FT-IR of the synthesized TSAB

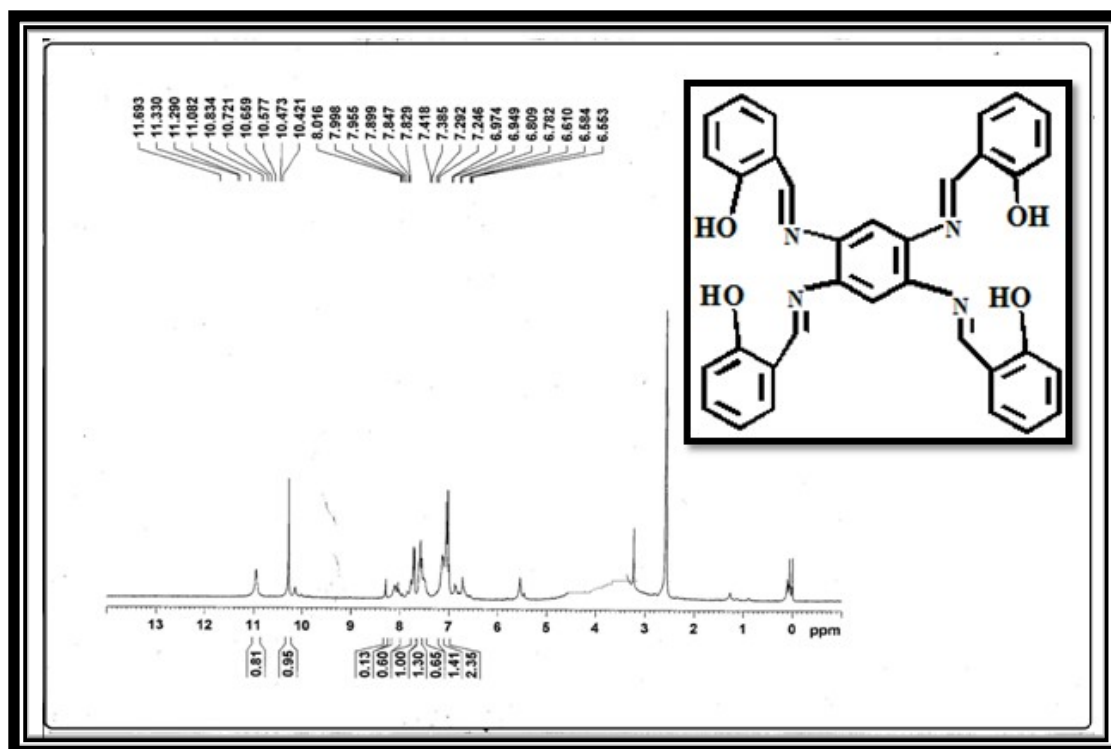

Fig. S2.  $^1\text{H-NMR}$  of the synthesized TSAB
